# Supplementary material
Source: publisher figshare collection journal article supplement (https://sage.figshare.com/ndownloader/files/15123167)
Supplement: Supplementary file 1 [file 15123167]

Table S1. The estimated number of smoking-related deaths and the proportion of all deaths attributable to smoking by sex and age, 1997—2016

| Age | 25+ | | | | 25—49 | | | | 50—69 | | | | 70+ | | | |
| --- | --- | --- | --- | --- | --- | --- | --- | --- | --- | --- | --- | --- | --- | --- | --- | --- |
| Sex | Men | | Women | | Men | | Women | | Men | | Women | | Men | | Women | |
| Year | n | % | n | % | n | % | n | % | n | % | n | % | n | % | n | % |
| 1997 | 4197 | 9.1 | 2338 | 5.1 | 72 | 3.3 | 96 | 8.1 | 1344 | 14.4 | 958 | 17.4 | 2781 | 8.0 | 1285 | 3.2 |
| 1998 | 4125 | 9.0 | 2120 | 4.6 | 56 | 2.7 | 79 | 6.7 | 1252 | 13.6 | 981 | 17.6 | 2817 | 8.1 | 1060 | 2.7 |
| 1999 | 4224 | 9.2 | 2310 | 4.8 | 77 | 3.7 | 91 | 7.4 | 1221 | 13.5 | 1014 | 18.2 | 2925 | 8.4 | 1206 | 2.9 |
| 2000 | 3982 | 8.8 | 2367 | 5.0 | 72 | 3.6 | 85 | 7.6 | 1197 | 13.6 | 1132 | 19.7 | 2713 | 7.9 | 1149 | 2.8 |
| 2001 | 4086 | 9.1 | 2955 | 6.2 | 66 | 3.2 | 67 | 6.2 | 1167 | 13.1 | 1248 | 21.9 | 2854 | 8.4 | 1640 | 4.0 |
| 2002 | 4063 | 9.0 | 3110 | 6.4 | 50 | 2.7 | 78 | 7.3 | 1163 | 13.0 | 1192 | 21.1 | 2850 | 8.3 | 1840 | 4.4 |
| 2003 | 3978 | 8.9 | 3039 | 6.4 | 62 | 3.3 | 67 | 6.3 | 1194 | 13.4 | 1183 | 21.0 | 2723 | 8.0 | 1789 | 4.4 |
| 2004 | 4058 | 9.4 | 3267 | 7.1 | 58 | 3.2 | 76 | 7.4 | 1140 | 12.7 | 1349 | 23.9 | 2860 | 8.8 | 1842 | 4.7 |
| 2005 | 4583 | 10.4 | 3597 | 7.7 | 44 | 2.5 | 44 | 4.4 | 1262 | 13.9 | 1490 | 25.1 | 3277 | 9.8 | 2063 | 5.2 |
| 2006 | 4456 | 10.2 | 3985 | 8.5 | 58 | 3.4 | 58 | 5.7 | 1159 | 12.8 | 1351 | 23.6 | 3239 | 9.9 | 2577 | 6.5 |
| 2007 | 3906 | 9.0 | 4128 | 8.7 | 29 | 1.6 | 47 | 4.8 | 1135 | 12.5 | 1361 | 23.5 | 2743 | 8.4 | 2719 | 6.7 |
| 2008 | 4281 | 9.8 | 4235 | 9.0 | 26 | 1.5 | 50 | 5.0 | 1154 | 12.6 | 1438 | 24.4 | 3101 | 9.5 | 2747 | 6.8 |
| 2009 | 4210 | 9.8 | 4219 | 9.2 | 29 | 1.7 | 68 | 6.9 | 1026 | 11.5 | 1339 | 22.8 | 3155 | 9.7 | 2812 | 7.2 |
| 2010 | 4436 | 10.2 | 4257 | 9.2 | 23 | 1.4 | 29 | 3.3 | 1109 | 12.3 | 1371 | 23.4 | 3305 | 10.1 | 2857 | 7.2 |
| 2011 | 4352 | 10.1 | 4705 | 10.2 | 31 | 1.8 | 27 | 2.9 | 1027 | 11.4 | 1205 | 21.2 | 3294 | 10.2 | 3473 | 8.8 |
| 2012 | 4326 | 9.9 | 4662 | 9.8 | 34 | 2.0 | 20 | 2.0 | 995 | 11.4 | 1213 | 20.6 | 3297 | 9.9 | 3430 | 8.5 |
| 2013 | 4096 | 9.5 | 4647 | 10.0 | 19 | 1.1 | 24 | 2.5 | 963 | 11.0 | 1292 | 22.0 | 3115 | 9.5 | 3331 | 8.4 |
| 2014 | 3817 | 8.9 | 5089 | 11.2 | 9 | 0.6 | 30 | 3.1 | 844 | 9.9 | 1231 | 21.4 | 2964 | 9.1 | 3828 | 9.9 |
| 2015 | 4052 | 9.2 | 4788 | 10.4 | 19 | 1.1 | 13 | 1.5 | 874 | 10.4 | 978 | 17.3 | 3159 | 9.3 | 3797 | 9.6 |
| 2016 | 3950 | 9.0 | 5024 | 10.9 | 30 | 1.7 | 6 | 0.7 | 801 | 9.7 | 930 | 17.1 | 3119 | 9.2 | 4088 | 10.2 |

Note: Estimates of number of smoking-related deaths have been rounded to integers.
